# Supplementary material for: Evaluating the Tactical Combat Casualty Care principles in civilian and military settings: systematic review, knowledge gap analysis and recommendations for future research
Source: HighWire-hosted journal article supplement (doi:10.1136/tsaco-2021-000773), 2021-10-01
Supplement: tsaco-2021-000773supp001_data_supplement.pdf [file tsaco-2021-000773supp001_data_supplement.pdf]

### Supplemental Table 1 – Ovid MEDLINE Search Strategy

Database: Ovid MEDLINE: Epub Ahead of Print, In-Process & Other Non-Indexed Citations, Ovid MEDLINE® Daily and Ovid MEDLINE® <1946-Present>

Search Strategy:

- 
- 1 trauma\$.tw. [ trauma search terms ]
  - 2 exp "Wounds and Injuries"/
  - 3 injur\$.tw.
  - 4 or/1-3
  - 5 \*Air Ambulances/ [ intervention search terms ]
  - 6 \*Blood Safety/mt [Methods]
  - 7 \*Blood Coagulation Factors/
  - 8 \*Fracture, Bone/th [Therapy]
  - 9 \*Heating/is, mt [Instrumentation, Methods]
  - 10 \*Hemostatic Techniques/
  - 11 \*Hypothermia/bl, di, dt, is, pc, th [Blood, Diagnosis, Drug Therapy, Instrumentation, Prevention and Control, Therapy]
  - 12 \*Military Medicine/dt, ed, in, is, mt, pc, st, su, td [Drug Therapy, Education, Injuries, Instrumentation, Methods, Prevention & Control, Standards, Surgery, Trends]
  - 13 \*Occlusive Dressings/
  - 14 \*Pneumothorax/di, dt, is, pc, th [Diagnosis, Drug Therapy, Instrumentation, Prevention and Control, Therapy]
  - 15 \*Rewarming/
  - 16 \*Splints/is, mt, tu, th [Instrumentation, Methods, Therapeutic Use, Therapy]
  - 17 \*Thoracostomy/
  - 18 \*Tourniquets/
  - 19 \*Thermogenesis/
  - 20 (air adj2 evacuat\$.tw.
  - 21 (aero\$ adj2 evacuat\$.tw.
  - 22 (blood adj storage).tw.
  - 23 (blood adj warm\$.tw.
  - 24 (bowel adj evisceration).tw.
  - 25 blanket\$.tw.
  - 26 "blood clotting factor?".tw.
  - 27 "blood coagulation factor?".tw.
  - 28 cricothyrotom\$.tw.

- 29 cricothyroidotom\$.tw.
- 30 (heat adj retention).tw.
- 31 (heat adj preserv\$).tw.
- 32 (h?emorrhage adj control).tw.
- 33 (h?emostatic adj technique?).tw.
- 34 (h?emostatic adj dressing?).tw.
- 35 (h?emostatic adj agent?).tw.
- 36 (intravenous adj nutrient\$).tw.
- 37 MEDEVAC.tw.
- 38 (needle adj decompression).tw.
- 39 (needle adj thoracostom\$).tw.
- 40 normo?therm\$.tw.
- 41 (occlusive adj bandage?).tw.
- 42 (pelvic adj binder?).tw.
- 43 (pressure adj dressing?).tw.
- 44 pneumothorax\$.tw.
- 45 rewarm\$.tw.
- 46 re-warm\$.tw.
- 47 splint?.tw.
- 48 (stop\$ adj bleed\$).tw.
- 49 (stop\$ adj "blood loss\$").tw.
- 50 (thermal adj regulat\$).tw.
- 51 (thermal adj manag\$).tw.
- 52 (temperature adj regulat\$).tw.
- 53 (temperature adj manag\$).tw.
- 54 thermo?regulation.tw.
- 55 thermo?genesis.tw.
- 56 (warming adj system\$).tw.
- 57 (warm\$ adj2 fluid\$).tw.
- 58 (warm\$ adj2 device\$).tw.
- 59 or/5-58
- 60 clinical trial.mp. or clinical trial.pt. or random\$.mp. or tu.xs. [ RCT filter - validated high sensitivity ]
- 61 Controlled Clinical Trial/ [ quasi-expt-observ study filter ]
- 62 Observational Study/
- 63 (descriptive adj3 stud\$).tw.
- 64 (descriptive adj3 design).tw.
- 65 (descriptive adj3 analys?s).tw.

66 nonrandom\$.tw.  
67 non-random\$.tw.  
68 non-experiment\$.tw.  
69 nonexperiment\$.tw.  
70 (natural adj experiment?).tw.  
71 (observational\$ adj3 stud\$).tw.  
72 (observational\$ adj3 design).tw.  
73 (observational\$ adj3 analys?s).tw.  
74 quasirandom\$.tw.  
75 quasi-random\$.tw.  
76 quasiexperimental.tw.  
77 quasi-experimental.tw.  
78 exp Cohort Studies/  
79 Registries/  
80 Epidemiologic Methods/  
81 limit 80 to yr=1971-1988  
82 cohort\$.tw.  
83 (follow-up adj stud\$).tw.  
84 (followup adj stud\$).tw.  
85 (follow-up adj design).tw.  
86 (followup adj design).tw.  
87 (follow-up adj analys?s).tw.  
88 (followup adj analys?s).tw.  
89 (follow-up and base-line).tw.  
90 (followup and baseline).tw.  
91 longitudinal.tw.  
92 ("long term" adj stud\$).tw.  
93 (longterm adj stud\$).tw.  
94 ("long term" adj design).tw.  
95 (longterm adj design).tw.  
96 ("long term" adj analys?s).tw.  
97 (longterm adj analys?s).tw.  
98 (population adj stud\$).tw.  
99 (population adj analys?s).tw.  
100 prospective.tw.  
101 retrospective.tw.  
102 registry.tw.

103 registries.tw.  
104 Cross-Sectional Studies/  
105 (cross adj sectional).tw.  
106 (incidence adj stud\$.tw.  
107 (prevalence adj stud\$.tw.  
108 (transversal adj stud\$.tw.  
109 exp Case-Control Studies/  
110 Control Groups/  
111 Matched-Pair Analysis/  
112 (case\$ adj3 control\$.tw.  
113 (case adj3 comparison\$.tw.  
114 (case\$ and series).tw.  
115 case-referent.tw.  
116 (control\$ adj3 stud\$.tw.  
117 (control adj group\$.tw.  
118 before-after.tw.  
119 "before and after".tw.  
120 (before adj after).tw.  
121 (time adj series).tw.  
122 Evaluation Studies/  
123 Comparative Study/  
124 Multicenter Study/  
125 Pilot Projects/  
126 Program Evaluation/  
127 Validation Studies/ (  
128 (comparative adj stud\$.tw.  
129 (comparison adj stud\$.tw.  
130 (evaluation adj stud\$.tw.  
131 effectiveness.tw.  
132 intervention.tw.  
133 (multicenter adj stud\$.tw.  
134 (multi-center adj stud\$.tw.  
135 (multicenter adj stud\$.tw.  
136 (multi-center adj stud\$.tw.  
137 (multidimensional adj stud\$.tw.  
138 (multi-dimensional adj stud\$.tw.  
139 (pre- adj5 post-).tw.

- 140 (pretest adj5 posttest).tw.  
141 (program\$ adj6 evaluat\$).tw.  
142 or/60-79,81-141  
143 4 and 59 and 142  
144 exp Animals/ not (exp Animals/ and Humans/) [ remove animal studies ]  
145 143 not 144  
146 (child: or infan: or p?ediatric?).mp. not ((child: or infan: or p?ediatric?).mp. and Adult/) [ remove pediatric studies ]  
147 145 not 146  
148 limit 147 to (english language and yr="2001 -Current")
