# Supplementary material for: Evaluating the Tactical Combat Casualty Care principles in civilian and military settings: systematic review, knowledge gap analysis and recommendations for future research
Source: HighWire-hosted journal article supplement (doi:10.1136/tsaco-2021-000773), 2021-10-01
Supplement: tsaco-2021-000773supp002_data_supplement.pdf [file tsaco-2021-000773supp002_data_supplement.pdf]

**Supplemental Table 2 – Patient Characteristics and Summary of Interventions/Outcomes.**

| Study                             | Sample Size | Participant Type                                                   | 1. ISS*<br>2. Age*<br>3. Male (%)                        | Intervention                                              | Outcomes / Main Findings                                                                                                                                         |
|-----------------------------------|-------------|--------------------------------------------------------------------|----------------------------------------------------------|-----------------------------------------------------------|------------------------------------------------------------------------------------------------------------------------------------------------------------------|
| <b>Massive Hemorrhage Control</b> |             |                                                                    |                                                          |                                                           |                                                                                                                                                                  |
| Smith 2019 [18]                   | 238         | Patients with extremity injuries                                   | 1. 10.9 <sup>a</sup><br>2. 34.5 <sup>a</sup><br>3. 87%   | 1. Tourniquet<br>2. No tourniquet                         | Tourniquet:<br>1. Associated with ↑ SBP on arrival<br>2. ↓ blood products use<br>3. ↓ limb related complications                                                 |
| Winstanley 2019 [23]              | 3792        | Injured patients NISS ≥15, with extremity injuries                 | 1. 36.0 <sup>a</sup><br>2. 24.8 <sup>b</sup><br>3. 97.2% | 1. Hemostatic agent<br>2. No hemostatic agent             | Hemostatic agents:<br>1. Associated with improved survival in those more severely injured                                                                        |
| Duignan 2018 [33]                 | 84          | Serious bleeding from extremity injury                             | 1. NR<br>2. NR<br>3. 73.8%                               | 1. Tourniquet<br>2. No tourniquet                         | Tourniquet:<br>1. All tourniquet applications were inappropriate<br>2. No complications resulted                                                                 |
| Kauvar 2018 [25]                  | 455         | ≥1 arterial injury to main lower limb                              | 1. NR<br>2. NR<br>3. NR                                  | 1. Tourniquet<br>2. No tourniquet                         | Field tourniquet:<br>1. ↑ wound infection<br>2. ↑ Neuro compromise but not limb loss                                                                             |
| Schauer 2018 [29]                 | 28212       | Traumatically injured patients                                     | 1. NR<br>2. NR<br>3. NR                                  | 1. Hemostatic<br>2. No Hemostatic                         | Hemostatic agents:<br>1. ↑ use in GSW, traumatic amputations, tourniquet application<br>2. ↑ blood product use                                                   |
| Schauer 2017 [31]                 | 705         | Casualties in Afghanistan                                          | 1. NR<br>2. NR<br>3. NR                                  | 1. QCCG<br>2. Non-QCCG                                    | QCCG casualties:<br>1. Had ↑ GSWs vs. baseline population<br>2. Hemorrhage control success similar to other military and civilian reports                        |
| Dunn 2016 [20]                    | 24          | Trauma with extremity injuries                                     | 1. NR<br>2. 25.0 <sup>a</sup><br>3. NR                   | 1. Tourniquet<br>2. No comparison                         | Tourniquet:<br>1. High survivability of patients transported with tourniquet<br>2. Authors support battlefield tourniquet application                            |
| Kragh 2015 [28]                   | 1413        | Military casualties in Afghanistan or Iraq                         | 1. 20.0 <sup>a</sup><br>2. 24.0 <sup>b</sup><br>3. NR    | 1. Tourniquet<br>2. No tourniquet                         | Tourniquet:<br>1. Associated with worse shock and ↑ transfusion requirements<br>2. Survival rates similar to transfused casualties with no tourniquets           |
| Ode 2015 [27]                     | 56          | Patients with penetrating limb injuries or open bleeding fractures | 1. 9.0 <sup>b</sup><br>2. NR<br>3. NR                    | 1. Tourniquet<br>2. No tourniquet                         | Tourniquet:<br>1. Majority of tourniquets applied appropriately to civilians requiring hemorrhage control                                                        |
| Bonner 2011 [61]                  | 167         | Military trauma in Afghanistan who had a pelvic x-ray              | 1. NR<br>2. NR<br>3. NR                                  | 1. Pelvic binder application<br>2. No comparator          | Pelvic binder:<br>1. Application above level of greater trochanters is common and does not reduce pelvic fractures<br>2. Likely to delay cardiovascular recovery |
| Pozza 2011 [30]                   | 21          | Soldiers with GSWs treated with local hemostatic care              | 1. NR<br>2. NR<br>3. 100%                                | 1. Celox<br>2. No Celox                                   | Celox granules:<br>1. Quick and efficient haemostatic action producing a stable clot                                                                             |
| Pollak 2010 [32]                  | 218         | Injured combat patients                                            | 1. NR<br>2. NR<br>3. NR                                  | 1. NPWT during aeromedical evacuation<br>2. No comparator | Negative pressure wound therapy:<br>1. Seems safe and feasible<br>2. Complications due to injury severity, unrelated to NPWT failure.                            |
| Clasper 2009 [24]                 | 44          | Military combat casualties                                         | 1. NR<br>2. NR<br>3. NR                                  | 1. Tourniquet<br>2. No tourniquet                         | Tourniquet:<br>1. Significant ↑ in deep infection rate (32% vs. 4.5%)                                                                                            |

|                              |      |                                                                   |                                                                        |                                                                    |                                                                                                                                                                                                                                                  |
|------------------------------|------|-------------------------------------------------------------------|------------------------------------------------------------------------|--------------------------------------------------------------------|--------------------------------------------------------------------------------------------------------------------------------------------------------------------------------------------------------------------------------------------------|
| Cox 2009 [17]                | 44   | Patients with IED injuries or GSWs                                | 1. NR<br>2. NR<br>3. NR                                                | 1. QuikClot<br>2. HemCon<br>3. QuikClot + HemCon                   | Hemostatic agents:<br>1. Stop or ↓ bleeding<br>2. HemCon appears safe, QuikClot may produce superficial burns                                                                                                                                    |
| Beekley 2008 [19]            | 165  | Patients with amputations and vascular injuries                   | 1. NR<br>2. NR<br>3. NR                                                | 1. Tourniquet<br>2. No tourniquet                                  | Tourniquet:<br>1. ↑ Prehospital hemorrhage control, notably in those ISS>15<br>2. 57% of deaths preventable with early use<br>3. No early adverse outcomes                                                                                       |
| Brodie 2007 [22]             | 70   | Casualties treated at field hospitals in Iraq and Afghanistan     | 1. 16.0 <sup>b</sup><br>2. NR<br>3. NR                                 | 1. Tourniquet<br>2. No comparator                                  | Tourniquet:<br>1. Prehospital use can be life saving for severe isolated limb injuries, profound hypovolemic shock and need for massive transfusion                                                                                              |
| Lakstein 2002 [21]           | 91   | Soldiers, civilians and casualties of combat or terrorist attacks | 1. NR<br>2. NR<br>3. NR                                                | 1. Tourniquet applied in prehospital setting<br>2. No comparator   | Tourniquet:<br>1. Effective and easy method for preventing exsanguination in military prehospital setting                                                                                                                                        |
| <b>Airway Management</b>     |      |                                                                   |                                                                        |                                                                    |                                                                                                                                                                                                                                                  |
| Schauer 2019 [34]            | 216  | Trauma patients treated in the prehospital setting                | 1. NR<br>2. NR<br>3. 98.14%                                            | 1. SGA en-route to military ED<br>2. CTY en-route to military ED   | All interventions:<br>1. No difference in short-term outcomes comparing both interventions                                                                                                                                                       |
| Hardy 2018 [37]              | 617  | Combat trauma treated in the prehospital setting                  | 1. 14.0 <sup>a</sup> (14)<br>2. 25.0 <sup>a</sup> (5)<br>3. 98%        | 1. BVM<br>2. SGA<br>3. CTY                                         | All interventions:<br>1. SGA ↑ morbidity<br>2. No difference in survival between groups                                                                                                                                                          |
| Shavit 2018 [38]             | 65   | Patients treated in the prehospital setting                       | 1. NR<br>2. 22.0 <sup>b</sup> (17-30)<br>3. 100%                       | 1. ETI<br>2. LMA                                                   | All interventions:<br>1. In failed ETI, LMA can effectively treat combat casualties during a short transport time                                                                                                                                |
| Barnard 2014 [40]            | 34   | Patients with combat trauma                                       | 1. NR<br>2. NR<br>3. 97.0%                                             | 1. CTY<br>2. No comparator                                         | Cricothyrotomy:<br>1. Procedural success was higher than previously reported                                                                                                                                                                     |
| Lockey 2014 [35]             | 7256 | Patients treated in the prehospital setting                       | 1. NR<br>2. NR<br>3. NR                                                | 1. Intubation by non-anesthetists<br>2. Intubation by anesthetists | Intubation:<br>1. Non-anesthetists 2x more likely to perform rescue airway intervention vs anesthetists                                                                                                                                          |
| Struck 2011 [39]             | 23   | Patients treated in the prehospital Setting                       | 1. NR<br>2. NR<br>3. NR                                                | 1. Tracheal intubation via GVSL<br>2. Conventional laryngoscopy    | Intubation adjuncts:<br>1. GSVL could be a valuable support instrument in the prehospital emergency management of difficult airways                                                                                                              |
| Cobas 2009 [36]              | 203  | Patients requiring emergency prehospital intervention             | 1. NR<br>2. 42.0 <sup>a</sup> (20)<br>3. 73%                           | 1. Prehospital intubation (failures)<br>2. No comparator           | Prehospital intubation:<br>1. 31% failed PHI; no mortality difference between properly vs improperly intubated<br>2. BVM can adequately manage airways in trauma patients who cannot be intubated                                                |
| <b>Respiratory/Breathing</b> |      |                                                                   |                                                                        |                                                                    |                                                                                                                                                                                                                                                  |
| Bozzay 2018 [44]             | 115  | Patients treated in the prehospital Setting                       | 1. 30.8 <sup>a</sup> (11.6)<br>2. 24.7 <sup>a</sup> (5.4)<br>3. 99.1%  | 1. Thoracostomy tube insertion<br>2. No comparator                 | Thoracostomy:<br>1. Number of TTs placed significantly ↑ RH development ( $p=0.0439$ )                                                                                                                                                           |
| Lesperance 2018 [42]         | 477  | Patients treated in the prehospital Setting                       | 1. 29.6 <sup>a</sup> (14.6)<br>2. 41.5 <sup>a</sup> (17.6)<br>3. 77.3% | 1. Prehospital needle decompression<br>2. No comparator            | Prehospital needle decompression:<br>1. Injured chest wall significantly thicker at 2 <sup>nd</sup> ICS MCL and 5 <sup>th</sup> ICS AAL (both $p < 0.005$ )<br>2. ↑ chest wall thickness correlated with catheter failure to reach pleural space |
| Weichenthal 2016 [48]        | 169  | Patients assessed by EMS                                          | 1. 71.64 <sup>a</sup><br>2. 38.0 <sup>a</sup><br>3. 87%                | 1. NT<br>2. No comparator                                          | Needle thoracostomy:<br>1. Safe when performed by EMS paramedics in most settings                                                                                                                                                                |

|                        |      |                                                              |                                                                        |                                                                      |                                                                                                                                                                                                                                                                             |
|------------------------|------|--------------------------------------------------------------|------------------------------------------------------------------------|----------------------------------------------------------------------|-----------------------------------------------------------------------------------------------------------------------------------------------------------------------------------------------------------------------------------------------------------------------------|
|                        |      |                                                              |                                                                        |                                                                      | 2. Effective in blunt and penetrating trauma patients, most beneficial when unstable                                                                                                                                                                                        |
| Blenkinsop 2015 [50]   | 63   | Patients treated in the prehospital Setting                  | 1. NR<br>2. 24.0 <sup>b</sup> (21-27)<br>3. 100%                       | 1. NCD<br>2. No comparator                                           | Needle chest decompression:<br>1. No significant difference between sites<br>2. 55mm catheter will decompress 99% of tension PTX without complications; >60mm not recommended                                                                                               |
| Weichenthal 2015 [47]  | 64   | Patients treated in the prehospital Setting                  | 1. NR<br>2. 40.0 <sup>a</sup><br>3. 84%                                | 1. NT with >60min Transport time<br>2. NT with <60min Transport time | Needle thoracostomy:<br>1. No significant difference in survival in prolonged vs short transport times                                                                                                                                                                      |
| Ball 2010 [46]         | 101  | Traumatic injuries requiring prehospital intervention        | 1. NR<br>2. NR<br>3. NR                                                | 1. NT placed by HEMS<br>2. NT placed by GEMS                         | Needle thoracostomy:<br>1. Tension PTX decompression using 3.2cm catheter failed in 65%<br>2. 4.5cm catheter ↓ failure rate                                                                                                                                                 |
| Blaivas 2010 [49]      | 57   | Patients treated on arrival via EMS to ED                    | 1. NR<br>2. NR<br>3. NR                                                | 1. NT followed by US in Emergency Room<br>2. No comparator           | Needle thoracostomy:<br>1. 26% of prehospital patients with suspected PTX appeared to not have a PTX originally; patient should be evaluated with bedside US first                                                                                                          |
| Matsumoto 2009 [26]    | 34   | Cardiac arrest patients with blunt trauma                    | 1. NR<br>2. NR<br>3. 64.7%                                             | 1. Prehospital thoracotomy<br>2. No comparator                       | Prehospital thoracotomy:<br>1. No survivors<br>2. Early access to an emergency field thoracotomy may improve possibility of survival                                                                                                                                        |
| Aylwin 2008 [41]       | 52   | Patients requiring either prehospital or ED intervention     | 1. NR<br>2. 29.0 <sup>b</sup> (22-29)<br>3. 85%                        | 1. Prehospital thoracostomy<br>2. No comparator                      | Prehospital thoracostomy:<br>1. 61% appropriately indicated for suspected tension PTX<br>2. 14% complication rate; 31% chest tubes poorly placed; 17% required repositioning.<br>3. Pleural drainage has potential to cause life-threatening injury, especially prehospital |
| Warner 2008 [51]       | 28   | Patients treated in the prehospital Setting                  | 1. NR<br>2. NR<br>3. NR                                                | 1. NT<br>2. No comparator                                            | Needle thoracostomy:<br>1. EMS NT safe and resulted in four cases of unexpected survival                                                                                                                                                                                    |
| Davis 2005 [52]        | 81   | Trauma patient requiring intervention by aeromedical crews   | 1. NR<br>2. NR<br>3. NR                                                | 1. NT<br>2. TT                                                       | All interventions:<br>1. ↓ complication rate and a small but significant group of unexpected survivors support use of these by aeromedical staff                                                                                                                            |
| Spanjersberg 2005 [45] | 149  | Patients treated en-route or in ED                           | 1. 23.3 <sup>a</sup><br>2. NR<br>3. 82.55%                             | 1. Prehospital TT<br>2. ED TT                                        | Tube thoracostomy:<br>1. Infected hemothoraces were non-significantly related to 9% of prehospital and 12% of ED-performed TTs                                                                                                                                              |
| <b>Circulation</b>     |      |                                                              |                                                                        |                                                                      |                                                                                                                                                                                                                                                                             |
| Boudreau 2019 [65]     | 116  | Patients treated en-route or in ED                           | 1. NR<br>2. NR<br>3. NR                                                | 1. TXA en-route (HEMS)<br>2. TXA in ED                               | Tranexamic acid:<br>1. No difference in complications or mortality                                                                                                                                                                                                          |
| Cornelius 2018 [64]    | 133  | Trauma patient with hemorrhage ± signs of shock and ISS ≥ 20 | 1. All ≥20.0<br>2. NR<br>3. NR                                         | 1. TXA<br>2. Non-TXA                                                 | Tranexamic acid:<br>1. Non-TXA: less acutely injured, ↓ LOS and improved outcomes<br>2. Severely injured TXA survived despite high TRISS                                                                                                                                    |
| Heschl 2018 [58]       | 1267 | Patients treated in the prehospital setting                  | 1. 36.5 <sup>a</sup> (15.8)<br>2. 42.6 <sup>a</sup> (20.9)<br>3. 66.7% | 1. Transfusion of RCCs (HEMS)<br>2. No comparator                    | RCC transfusion:<br>1. HEMS RCC transfusion is feasible                                                                                                                                                                                                                     |

|                       |      |                                                                     |                                                                       |                                                                                                          |                                                                                                                                              |
|-----------------------|------|---------------------------------------------------------------------|-----------------------------------------------------------------------|----------------------------------------------------------------------------------------------------------|----------------------------------------------------------------------------------------------------------------------------------------------|
| Maddy 2018 [43]       | 650  | Trauma patients requiring air transport                             | 1. 27.0 <sup>a</sup> (13.3)<br>2. 27.0 <sup>a</sup> (7.4)<br>3. 98%   | 1. TV + ARDSNet table compliant<br>2. TV + ARDSNet table non-compliant                                   | ARDSNet compliant ventilation:<br>1. ↓ ventilator days, ICU days, and 30-day mortality                                                       |
| Moore 2018 [70]       | 144  | Injured adults with acute blood loss                                | 1. NR<br>2. NR<br>3. NR                                               | 1. Plasma<br>2. Usual care                                                                               | Plasma administration:<br>1. Use not associated with ↑ survival                                                                              |
| Sperry 2018 [55]      | 501  | Injured patients at risk for hemorrhagic shock during air transport | 1. 22.0 <sup>b</sup> (13-30)<br>2. NR<br>3. NR                        | 1. Plasma<br>2. Standard-care                                                                            | Plasma administration:<br>1. Prehospital administration safe and ↓ 30-day mortality and ↓ median PT                                          |
| Vitalis 2018 [54]     | 28   | Urgently injured or need surgical treatment <90min during combat    | 1. 25.0 <sup>b</sup> (21-38)<br>2. NR<br>3. 96%                       | 1. Battlefield blood transfusion<br>2. No transfusion                                                    | Battlefield transfusion:<br>1. ↓ time to first blood product transfusion for alpha casualties; FLYP is 1st line battlefield blood product    |
| Holcomb 2017 [53]     | 1058 | Trauma patients transported by helicopter                           | 1. 17.0 <sup>b</sup> (9-29)<br>2. 38.0 <sup>b</sup> (25-55)<br>3. 71% | 1. Prehospital blood products<br>2. Crystalloid (no blood products)                                      | Prehospital blood products:<br>1. Inconclusive results due to imbalance in SBP, GCS, and ISS between groups; unable to compare               |
| Schauer 2017 [68]     | 272  | Patients with hypotension, amputation, or penetrating torso trauma  | 1. 20.1 <sup>a</sup> (18)<br>2. NR<br>3. NR                           | 1. TXA<br>2. No TXA                                                                                      | Tranexamic acid:<br>1. Overall proportions of patients receiving TXA were low despite emphasis in the guidelines                             |
| Shackelford 2017 [60] | 502  | US military combat casualties                                       | 1. NR<br>2. NR<br>3. 98%                                              | 1. Prehospital transfusion<br>2. No prehospital transfusion but matched<br>3. No prehospital transfusion | Prehospital transfusion:<br>1. Use within minutes of injury associated with ↑ 24hr and 30d survival vs delayed transfusion or no transfusion |
| Miller 2016 [62]      | 3071 | Adult trauma air transported from the scene to trauma center        | 1. NR<br>2. NR<br>3. NR                                               | 1. Prehospital blood transfusion<br>2. No prehospital blood transfusion                                  | Prehospital blood transfusion:<br>1. No effect on 24-hr and overall in-hospital mortality                                                    |
| Savell 2016 [69]      | 1267 | US military personnel transported by MEDEVAC teams                  | 1. NR<br>2. NR<br>3. NR                                               | 1. PIV<br>2. IO<br>3. PIV + IO<br>4. No IV access                                                        | Intraosseous access:<br>1. Successfully used in the combat setting<br>2. Accounts for ~12% of vascular access in the MEDEVAC population      |
| Auten 2015 [59]       | 61   | Severely battle-injured personnel with ISS ≥15                      | 1. NR<br>2. NR<br>3. 100%                                             | 1. CTx / FWB<br>2. CTx                                                                                   | FWB:<br>1. Early use in resource-limited settings ↓ traumatic coagulopathy                                                                   |
| Jansen 2014 [67]      | 791  | Bleeding trauma patients                                            | 1. 22.0 <sup>b</sup><br>2. 22.0 <sup>b</sup> (19-25)<br>3. 99.1%      | 1. Massive transfusion<br>2. Non-massive transfusion                                                     | Massive transfusion:<br>1. Massive transfusion ↑ survival vs civilian patients                                                               |
| Nadler 2014 [66]      | 103  | Patients treated at scene                                           | 1. 16.0 <sup>b</sup> (9-25)<br>2. NR<br>3. NR                         | 1. Military personnel TXA<br>2. Civilian TXA                                                             | Tranexamic acid:<br>1. Administering in the field is feasible in the civilian and the military setting                                       |
| Perkins 2011 [56]     | 369  | Patients admitted to combat support hospital                        | 1. NR<br>2. NR<br>3. NR                                               | 1. FWB<br>2. Apheresis platelets                                                                         | All interventions:<br>1. No difference in survival between FWB or aPLT at 24 hours or at 30 days                                             |
| Borut 2010 [63]       | 80   | Combat soldiers with extremity vascular injuries                    | 1. NR<br>2. 23.8 <sup>a</sup><br>3. 100%                              | 1. TVS<br>2. Non-TVS                                                                                     | Temporary Vascular Shunt:<br>1. No significant difference in amputation rates in patients                                                    |

|                               |      |                                                                           |                                                                   |                                                                     |                                                                                                                                                                                                                                                |
|-------------------------------|------|---------------------------------------------------------------------------|-------------------------------------------------------------------|---------------------------------------------------------------------|------------------------------------------------------------------------------------------------------------------------------------------------------------------------------------------------------------------------------------------------|
| Wade<br>2010 [57]             | 2050 | US military<br>trauma patients                                            | 1. NR<br>2. NR<br>3. NR                                           | 1. rFVIIa<br>2. No rFVIIa                                           | rFVIIa use:<br>1. Not associated with an improvement in survival or an ↑ in complications                                                                                                                                                      |
| <b>Hypothermia Prevention</b> |      |                                                                           |                                                                   |                                                                     |                                                                                                                                                                                                                                                |
| Lundgren<br>2011 [16]         | 48   | Patients with<br>outdoor injury<br>transported by<br>EMS                  | 1. NR<br>2. NR<br>3. 39.6%                                        | 1. Passive warming<br>2. Active warming                             | Warming methods:<br>1. In mild hypothermia, prehospital passive warming slows rewarming rate and reduces cold discomfort<br>2. Adding active warming significantly ↑ thermal comfort and ↓ cold induced stress                                 |
| Cassidy<br>2001 [71]          | 20   | Hypothermic<br>patients                                                   | 1. NR<br>2. NR<br>3. NR                                           | 1. Warmed IVF<br>2. Non-warmed IVF                                  | IVF:<br>1. Prehospital IVF can be warmed in the field and can help ↓ morbidity and mortality from hypothermia                                                                                                                                  |
| <b>E-FAST</b>                 |      |                                                                           |                                                                   |                                                                     |                                                                                                                                                                                                                                                |
| O'Dochartaigh<br>2017 [76]    | 299  | Patients<br>requiring air<br>medical<br>transport                         | 1. NR<br>2. NR<br>3. NR                                           | 1. PHUS<br>2. No comparator                                         | Prehospital Ultrasound:<br>1. Supported use in medical and trauma patients with markers of higher acuity during HEMS transport                                                                                                                 |
| Yates<br>2017 [77]            | 190  | Blunt and<br>penetrating<br>trauma<br>patients                            | 1. NR<br>2. NR<br>3. NR                                           | 1. E-FAST by flight crew<br>2. E-FAST by trauma team                | E-FAST examination:<br>1. ↑ ability to assess patients in austere air medical and prehospital environments, help establish an early diagnosis, and ↓ iatrogenic injury potential                                                               |
| Kirkpatrick<br>2004 [75]      | 225  | Patients in<br>physiologic<br>extremes and<br>suspected of<br>having PTXs | 1. 14.0 <sup>b</sup> (5-27)<br>2. 37.0 <sup>b</sup><br>3. 74%     | 1. E-FAST Examination<br>2. E-FAST and CT scan<br>3. CT scan vs CXR | E-FAST examination:<br>1. Comparable specificity to CXR, more sensitive for occult PTX detection<br>2. + E-FAST findings should be addressed clinically or with CT depending on hemodynamic stability; use CT if detection of all PTXs desired |
| <b>Mixed</b>                  |      |                                                                           |                                                                   |                                                                     |                                                                                                                                                                                                                                                |
| Meizoso<br>2015 [73]          | 3733 | Patients arriving<br>via EMS from<br>injury scene                         | 1. 5.0 <sup>b</sup> (1-14)<br>2. 39.0 <sup>a</sup> (19)<br>3. 74% | 1. PHI<br>2. No PHI                                                 | Prehospital interventions:<br>1. ↓ mortality in severely injured trauma patients and do not delay transport to definitive care                                                                                                                 |
| Mahshidfar<br>2013 [74]       | 60   | Patients with<br>possible spinal<br>trauma                                | 1. NR<br>2. NR<br>3. NR                                           | 1. Long Backboard<br>2. Vacuum Mattress Splint                      | All interventions:<br>1. Long backboard ↑ immobilization, easier to use, and ↓ time to perform                                                                                                                                                 |
| Cancio<br>2008 [72]           | 192  | Patients air<br>transported to<br>three urban Level<br>I trauma centers   | 1. NR<br>2. NR<br>3. 71.7%                                        | 1. LSIs<br>2. Usual care                                            | Lifesaving interventions:<br>1. HRC may help identify the severely injured                                                                                                                                                                     |

**Legend:** \* - mean or median, a – mean, b – median, AAL – anterior axillary line, aPLT – apheresis platelet, BVM – bag valve mask, CTx – component therapy, CTY – cricothyrotomy, CXR – chest x-ray, E-FAST – Extended Focused Assessment with Sonography in Trauma, ETI – endotracheal intubation, FLYP – French lyophilized plasma, FWB – fresh whole blood, GCS – Glasgow coma scale, GEMS – ground emergency medical services, GSVL – Glidescope video laryngoscope, GSW – gunshot wound, HEMS – helicopter emergency medical service, HRC – heart rate complexity, ICS – intercostal space, IDF – Israeli Defense Force, IED – improvised explosive device, IO – intraosseous, IVF – intravenous fluid, LL – lower limb, LMA – laryngeal mask airway, LSI – life saving intervention, MCL – midclavicular line, NCD – needle chest decompression, NISS – new injury severity score, NPWT – negative pressure wound therapy, NR – not reported, NT – needle thoracostomy, PHI – prehospital intervention, PHUS – prehospital ultrasound, PIV – peripheral intravenous line, POCUS – point of care ultrasound, PT – prothrombin time, PTX – pneumothorax, QCCG – QuikClot® Combat Gauze®, RCC – red cell concentrate, RH – retained hemothorax, SBP – systolic blood pressure, SGA – supraglottic airway, TRISS – trauma revised injury severity score, TT – tube thoracostomy, TV – tidal volume, TVS – temporary vascular shunt, TXA – tranexamic acid.
