# Supplementary material for: Evaluating the Tactical Combat Casualty Care principles in civilian and military settings: systematic review, knowledge gap analysis and recommendations for future research
Source: HighWire-hosted journal article supplement (doi:10.1136/tsaco-2021-000773), 2021-10-01
Supplement: tsaco-2021-000773supp003_data_supplement.pdf [file tsaco-2021-000773supp003_data_supplement.pdf]

Supplemental Table 3 – Newcastle-Ottawa Cohort Studies | Appraisal Results.

| Study                   | Selection                                |                                     |                               |                                                                      | Comparability<br>(can have up to 2 stars) | Outcome                   |                           |                           | Rating |
|-------------------------|------------------------------------------|-------------------------------------|-------------------------------|----------------------------------------------------------------------|-------------------------------------------|---------------------------|---------------------------|---------------------------|--------|
|                         | Representativeness of exposed cohort (*) | Selection of non-exposed cohort (*) | Ascertainment of exposure (*) | Demonstration that outcome of interest not present at start of study | Comparability of cohorts (**)             | Assessment of outcome (*) | Long enough follow up (*) | Adequacy of follow up (*) |        |
| Boudreau 2019 [66]      | *                                        | *                                   | *                             | -                                                                    | *                                         | *                         | *                         | -                         | Good   |
| Schauer 2019 [35]       | *                                        | *                                   | *                             | *                                                                    | *                                         | *                         | -                         | -                         | Poor   |
| Winstanley 2019 [24]    | *                                        | *                                   | *                             | *                                                                    | *                                         | *                         | -                         | -                         | Poor   |
| Bozzay 2018 [45]        | *                                        | -                                   | *                             | *                                                                    | -                                         | *                         | -                         | -                         | Poor   |
| Cornelius 2018 [65]     | *                                        | *                                   | *                             | *                                                                    | *                                         | *                         | -                         | -                         | Poor   |
| Duignan 2018 [34]       | *                                        | -                                   | *                             | *                                                                    | -                                         | -                         | *                         | -                         | Poor   |
| Hardy 2018 [38]         | -                                        | *                                   | *                             | *                                                                    | -                                         | *                         | *                         | -                         | Poor   |
| Heschl 2018[59]         | *                                        | -                                   | *                             | *                                                                    | -                                         | *                         | -                         | -                         | Poor   |
| Kauvar 2018 [26]        | *                                        | *                                   | *                             | *                                                                    | *                                         | *                         | *                         | -                         | Good   |
| Lesperance 2018 [43]    | *                                        | -                                   | *                             | *                                                                    | -                                         | *                         | -                         | -                         | Poor   |
| Maddy 2018 [44]         | *                                        | -                                   | *                             | *                                                                    | *                                         | *                         | *                         | *                         | Poor   |
| Schauer 2018 [30]       | -                                        | *                                   | *                             | *                                                                    | -                                         | *                         | *                         | -                         | Poor   |
| Shavit 2018 [39]        | *                                        | *                                   | *                             | *                                                                    | **                                        | *                         | -                         | -                         | Poor   |
| Vitalis 2018 [55]       | *                                        | *                                   | *                             | *                                                                    | -                                         | *                         | *                         | *                         | Poor   |
| Holcomb 2017 [54]       | *                                        | *                                   | *                             | *                                                                    | *                                         | *                         | *                         | *                         | Good   |
| O'Dochartaigh 2017 [77] | *                                        | -                                   | *                             | -                                                                    | *                                         | *                         | -                         | *                         | Fair   |
| Schauer 2017 [69]       | *                                        | *                                   | *                             | -                                                                    | -                                         | *                         | -                         | -                         | Poor   |

|                          |   |   |   |   |    |   |   |   |      |
|--------------------------|---|---|---|---|----|---|---|---|------|
| Schauer<br>2017 [32]     | * | * | * | - | -  | * | - | - | Poor |
| Shackelford<br>2017 [61] | * | * | * | * | *  | * | * | - | Poor |
| Yates<br>2017 [78]       | * | * | * | - | -  | * | - | - | Poor |
| Dunn<br>2016 [21]        | * | - | * | * | -  | * | - | - | Poor |
| Miller<br>2016 [63]      | * | * | * | * | *  | * | * | * | Good |
| Savell<br>2016 [70]      | * | * | * | - | ** | * | * | - | Good |
| Weichenthal<br>2016 [49] | * | - | * | * | -  | * | - | * | Poor |
| Auten<br>2015 [60]       | * | - | * | * | *  | * | * | * | Good |
| Blenkinsop<br>2015 [51]  | - | - | * | * | -  | - | - | - | Poor |
| Kragh<br>2015 [29]       | * | * | * | * | -  | * | * | * | Poor |
| Meizoso<br>2015 [74]     | * | * | * | * | *  | * | * | * | Good |
| Ode<br>2015 [28]         | * | * | * | * | *  | * | - | - | Poor |
| Barnard<br>2014[41]      | * | - | * | * | -  | * | * | * | Poor |
| Jansen<br>2014 [68]      | * | * | * | * | ** | * | - | - | Poor |
| Lockey<br>2014 [36]      | * | * | * | * | ** | * | * | - | Poor |
| Nadler<br>2014 [67]      | * | * | * | * |    | * | * |   | Poor |
| Bonner<br>2011 [62]      | * | - | * | * | -  | * | * | - | Poor |
| Perkins<br>2011 [57]     | * | * | * | * | *  | * | * | * | Good |
| Pozza<br>2011 [31]       | * | - | - | - | -  | - | - | - | Poor |
| Struck<br>2011 [40]      | * | - | * | * | -  | * | * | - | Poor |
| Ball<br>2010 [47]        | * | - | * | * | *  | * | * | * | Good |
| Blaivas<br>2010 [50]     | * | - | - | - | -  | - | - | - | Poor |

|                           |   |   |   |   |   |   |   |   |      |
|---------------------------|---|---|---|---|---|---|---|---|------|
| Borut<br>2010 [64]        | * | * | * | * | - | * | - | - | Poor |
| Pollak<br>2010 [33]       | * | - | * | - | - | - | - | - | Poor |
| Clasper<br>2009 [25]      | * | * | * | * | * | * | * | - | Poor |
| Cobas<br>2009 [37]        | * | - | * | * | - | * | - | - | Poor |
| Cox<br>2009 [18]          | * | - | * | * | - | - | - | - | Poor |
| Matsumoto<br>2009 [27]    | * | * | * | * | * | * | * | * | Good |
| Aylwin<br>2008 [42]       | * | - | * | * | - | * | * | * | Poor |
| Beekley<br>2008 [20]      | * | * | * | * | - | * | * | * | Poor |
| Cancio<br>2008 [73]       | * | * | * | * | * | * | * | * | Good |
| Warner<br>2008 [52]       | * | - | * | - | - | * | - | - | Poor |
| Brodie<br>2007 [23]       | * | - | * | * | - | * | - | - | Poor |
| Davis<br>2005 [53]        | * | * | * | * | * | * | - | - | Poor |
| Spanjersberg<br>2005 [46] | * | * | * | * | * | * | * | * | Good |
| Lakstein<br>2002 [22]     | * | - | * | * | - | * | - | - | Poor |

Thresholds for converting the Newcastle-Ottawa scales to AHRQ standards (good, fair, and poor):

**Good quality:** 3 or 4 stars in Selection domain **AND** 1 or 2 stars in Comparability domain **AND** 2 or 3 stars in Outcome domain

**Fair quality:** 2 stars in Selection domain **AND** 1 or 2 stars in Comparability domain **AND** 2 or 3 stars in Outcome domain

**Poor quality:** 0 or 1 star in Selection domain **OR** 0 stars in Comparability domain **OR** 0 or 1 stars in Outcome domain
